# Supplementary material for: Impact of alkaloids in food consumption, metabolism and survival in a blood-sucking insect
Source: PubMed Central journal article supplement (PMC7287067; doi:10.1038/s41598-020-65932-y), 2020-06-10
Supplement: 41598_2020_65932_MOESM1_ESM.pdf [file 41598_2020_65932_MOESM1_ESM.pdf]

# Impact of alkaloids in food consumption, metabolism and survival in a blood-sucking insect

Ignacio J. Muñoz<sup>1,2</sup>, Pablo E. Schilman<sup>2\*</sup> and Romina B. Barrozo<sup>1\*</sup>

<sup>1</sup> Grupo de Neuroetología de Insectos Vectores, Laboratorio Fisiología de Insectos, Instituto Biodiversidad Biología Experimental Aplicada, CONICET - UBA, Departamento Biodiversidad Biología Experimental, Facultad Ciencias Exactas y Naturales, Universidad de Buenos Aires, Buenos Aires, Argentina.

<sup>2</sup> Laboratorio de Ecofisiología de Insectos, Instituto de Biodiversidad y Biología Experimental y Aplicada, CONICET-UBA, Departamento de Biodiversidad y Biología Experimental, Facultad de Ciencias Exactas y Naturales, Universidad de Buenos Aires, Argentina.

-----

**\* Equal contribution and corresponding authors:**

Romina B. Barrozo ([rbarrozo@bg.fcen.uba.ar](mailto:rbarrozo@bg.fcen.uba.ar))

Pablo E. Schilman ([schilman@bg.fcen.uba.ar](mailto:schilman@bg.fcen.uba.ar))

## SUPPLEMENTARY FIGURE

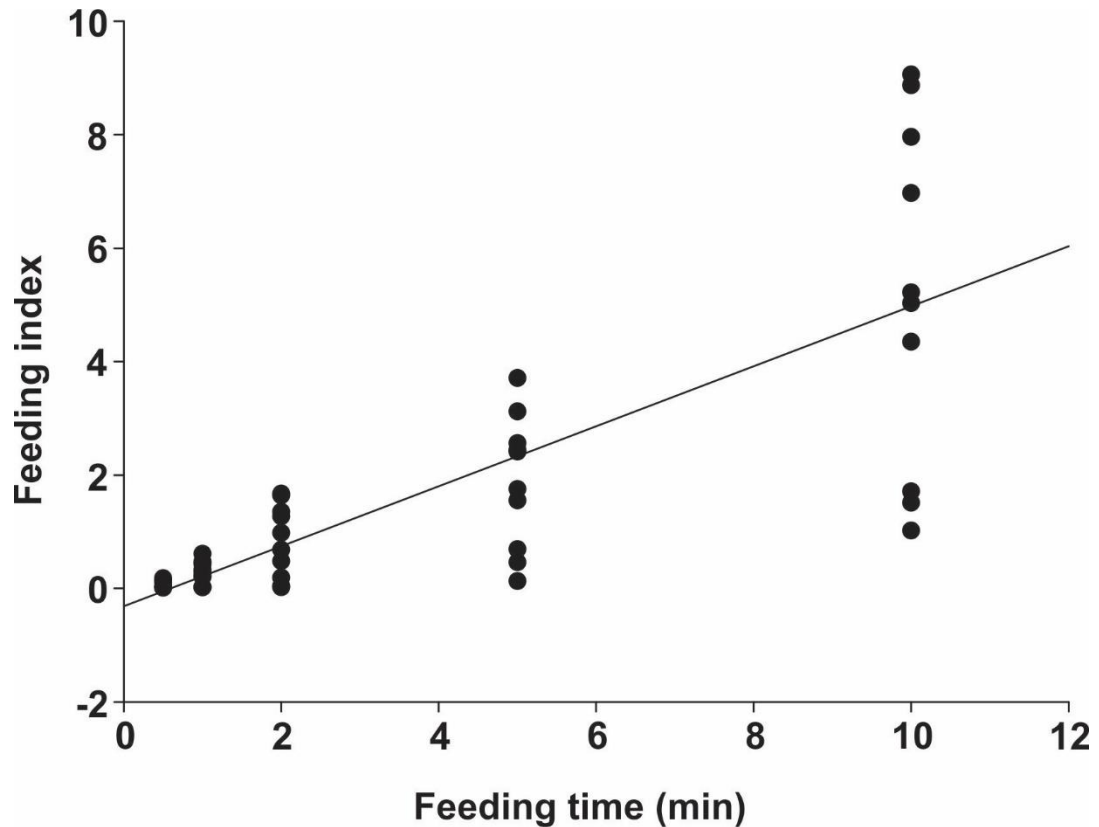

**Figure S1. Standardization of needed time for *R. prolixus* to elicit a FI = 1.**

Feeding index (FI) displayed as a function of the net feeding time. The feeding time for a FI = 1 was  $2.48 \pm 1.96$  minutes. To calculate this, a linear regression was computed with the “lm” function of the basic package of R. From this regression the time at which the FI is equal to 1 was obtained with the “inverse.predict” function of the “chemCal” package (Ranke et al., 2015). Ten insects were used for each time tested.

### BIBLIOGRAPHY

Ranke, J., Ranke, M.J., Suggests, M., 2015. Package “chemCal.” Packag. “chemCal” 1–11.
